# Supplementary material
Source: MDPI journal article supplement (https://www.mdpi.com/2673-4133/4/1/8)
Supplement: s1 [file s1]

## Supplementary material

Taxa list and numbers of individuals per body of water. The ID no. applies to the clear identification of the taxon. The individual numbers of the Ihle with gravel (G) may not be compared with those of the Nieplitz and the Verlorenwasser at this point, since a different number of sampling points were examined. A comparison of the Ihle without gravel with the Nieplitz and the Verlorenwasser is permissible:  $n_{\text{Ihle}}(G) = 39$  (with gravel, [I]),  $n_{\text{Ihle}} = 33$  (without gravel),  $n_{\text{Nieplitz}} = 33$  (N),  $n_{\text{Verlorenwasser}} = 33$  (V) each 0.0625 m<sup>2</sup>.

**Table S1.** Taxa list and numbers of individuals per body of water.

| Group                      | Family          | Species /Taxon                        | ID-Nr. | I (G) | I    | N     | V    |
|----------------------------|-----------------|---------------------------------------|--------|-------|------|-------|------|
| Bival-via                  | Corbiculidae    | <i>Corbicula fluminea</i>             | 11176  | 0     | 0    | 0     | 1    |
|                            | Sphaeriidae     | <i>Pisidium amnicum</i>               | 6409   | 46    | 46   | 4     | 8    |
|                            |                 | <i>Pisidium casertanum casertanum</i> | 6410   | 783   | 775  | 118   | 460  |
|                            |                 | <i>Pisidium henslowanum</i>           | 6418   | 8     | 8    | 0     | 9    |
|                            |                 | <i>Pisidium subtruncatum</i>          | 6426   | 240   | 238  | 14    | 58   |
|                            |                 | <i>Sphaerium corneum</i>              | 6882   | 453   | 442  | 0     | 5    |
| Coleop-tera                | Dytiscidae      | <i>Agabus sturmii</i>                 | 17494  | 1     | 1    | 0     | 0    |
|                            | Elmidae         | <i>Elmis</i> sp. Ad.                  | 12072  | 1     | 1    | 3     | 0    |
|                            |                 | <i>Elmis</i> sp. Lv.                  | 5095   | 62    | 60   | 127   | 2    |
|                            |                 | <i>Limnius</i> sp.                    | 18419  | 0     | 0    | 3     | 0    |
|                            |                 | <i>Limnius volckmari</i>              | 18421  | 150   | 118  | 0     | 0    |
|                            | Gyrinidae       | <i>Orectochilus villosus</i> Lv.      | 6200   | 39    | 39   | 0     | 0    |
| Crusta-<br>cea             | Haliplidae      | <i>Haliplus</i> sp. Lv.               | 5396   | 6     | 4    | 0     | 2    |
|                            | Asellidae       | <i>Asellus aquaticus</i>              | 8691   | 674   | 609  | 6     | 2    |
|                            | Gammaridae      | <i>Gammarus pulex</i>                 | 5291   | 1372  | 1295 | 33132 | 4513 |
|                            |                 | <i>Gammarus roeselii</i>              | 5292   | 761   | 755  | 0     | 0    |
| Diptera                    | [Ord:Diptera]   | <i>Diptera</i> Gen. sp.               | 9353   | 2     | 2    | 4     | 8    |
|                            | Ceratopogonidae | Ceratopogoninae/Palpomyiinae Gen. sp. | 14768  | 1     | 1    | 0     | 0    |
|                            | Chironomidae    | Chironomidae Gen. sp.                 | 4642   | 3036  | 3005 | 5003  | 4632 |
|                            | Culicidae       | Culicidae Gen. sp.                    | 7726   | 22    | 22   | 1     | 0    |
|                            | Limoniidae      | <i>Eloeophila</i> sp.                 | 9654   | 15    | 14   | 3     | 6    |
|                            | Pediciidae      | <i>Dicranota</i> sp.                  | 4955   | 32    | 27   | 10    | 48   |
|                            | Ptychopteridae  | <i>Ptychoptera</i> sp.                | 7492   | 1     | 1    | 22    | 272  |
|                            | Simuliidae      | <i>Simulium</i> sp.                   | 6853   | 1913  | 1848 | 6     | 146  |
|                            | Tabanidae       | Tabanidae Gen. sp.                    | 8485   | 37    | 36   | 21    | 7    |
|                            | Tipulidae       | <i>Tipula maxima</i>                  | 7075   | 0     | 0    | 0     | 1    |
| Epheme-roptera             |                 | <i>Tipula</i> sp.                     | 7077   | 1     | 1    | 0     | 8    |
|                            | Baetidae        | <i>Baetis buceratus</i>               | 4388   | 6     | 6    | 0     | 0    |
|                            |                 | <i>Baetis fuscatus</i>                | 4397   | 323   | 296  | 138   | 111  |
|                            |                 | <i>Baetis rhodani</i>                 | 4415   | 104   | 99   | 2     | 4    |
|                            |                 | <i>Baetis</i> sp.                     | 4419   | 397   | 319  | 830   | 8    |
|                            |                 | <i>Baetis vernus</i>                  | 4427   | 52    | 50   | 1     | 2    |
|                            | Ephemerellidae  | <i>Serratella ignita</i>              | 5131   | 1     | 0    | 0     | 0    |
|                            | Ephemeridae     | <i>Ephemera danica</i>                | 5124   | 3051  | 2943 | 254   | 405  |
|                            | Heptageniidae   | <i>Heptagenia sulphurea</i>           | 5457   | 124   | 91   | 0     | 13   |
|                            | Leptophlebiidae | <i>Paraleptophlebia submarginata</i>  | 6309   | 26    | 26   | 5     | 0    |
| Gastro-poda                | Bithyniidae     | <i>Bithynia tentaculata</i>           | 4462   | 1     | 1    | 1     | 0    |
|                            | Hydrobiidae     | <i>Potamopyrgus antipodarum</i>       | 8251   | 6     | 6    | 56    | 0    |
|                            |                 | <i>Galba truncatula</i>               | 5284   | 7     | 7    | 5     | 0    |
|                            | Lymnaeidae      | <i>Lymnaea stagnalis</i>              | 5916   | 9     | 9    | 0     | 0    |
|                            |                 | <i>Omphiscola glabra</i>              | 6191   | 5     | 5    | 0     | 0    |
|                            |                 | <i>Radix balthica</i>                 | 16959  | 8     | 6    | 0     | 0    |
|                            | Physidae        | <i>Physa fontinalis</i>               | 6395   | 14    | 14   | 0     | 1    |
|                            | Planorbidae     | <i>Ancylus fluviatilis</i>            | 4310   | 0     | 0    | 0     | 2    |
|                            |                 | <i>Bathyomphalus contortus</i>        | 4433   | 7     | 7    | 0     | 0    |
|                            |                 | <i>Gyraulus albus</i>                 | 5354   | 45    | 45   | 1     | 1    |
|                            |                 | <i>Pisidium supinum</i>               | 6431   | 2     | 2    | 0     | 11   |
|                            |                 | <i>Planorbarius corneus</i>           | 6431   | 2     | 2    | 0     | 0    |
| <i>Planorbis planorbis</i> |                 | 6436                                  | 3      | 3     | 0    | 0     |      |
| Hetero-ptera               | Aphelocheiridae | <i>Aphelocheirus aestivalis</i>       | 4335   | 26    | 18   | 0     | 0    |
|                            | Corixidae       | <i>Sigara</i> sp.                     | 6829   | 0     | 0    | 0     | 1    |

|              |                   |                                     |       |     |     |     |     |
|--------------|-------------------|-------------------------------------|-------|-----|-----|-----|-----|
| Hirudi-nea   | Erpobdellidae     | <i>Erpobdella octoculata</i>        | 5159  | 78  | 77  | 1   | 7   |
|              | Glossiphoniidae   | <i>Alboglossiphonia heteroclita</i> | 4261  | 1   | 0   | 4   | 6   |
|              |                   | <i>Alboglossiphonia hyalina</i>     | 7856  | 0   | 0   | 2   | 2   |
|              |                   | <i>Glossiphonia complanata</i>      | 5304  | 55  | 54  | 266 | 10  |
|              |                   | <i>Glossiphonia concolor</i>        | 5307  | 0   | 0   | 0   | 5   |
|              |                   | <i>Glossiphonia nebulosa</i>        | 7725  | 0   | 0   | 3   | 0   |
| Megalo-tera  | Sialidae          | <i>Sialis fuliginosa</i>            | 6821  | 3   | 3   | 3   | 3   |
|              |                   | <i>Sialis lutaria</i>               | 6822  | 1   | 0   | 6   | 14  |
| Odo-nata     | Calopterygidae    | <i>Calopteryx splendens</i>         | 4530  | 6   | 6   | 0   | 0   |
|              |                   | <i>Calopteryx virgo</i>             | 4532  | 8   | 8   | 0   | 0   |
| Oligo-chaeta | Cordulegastridae  | <i>Cordulegaster boltonii</i>       | 4740  | 0   | 0   | 4   | 5   |
|              | [Kl:Oligochaeta]  | Naididae/Tubificidae Gen. sp.       | 20200 | 318 | 308 | 10  | 0   |
|              |                   | Oligochaeta Gen. Sp.                | 8736  | 107 | 106 | 0   | 0   |
|              | Lumbricidae       | <i>Eiseniella tetraedra</i>         | 5075  | 8   | 8   | 2   | 3   |
| Plecop-tera  | Lumbriculidae     | <i>Lumbriculus variegatus</i>       | 5907  | 7   | 1   | 4   | 1   |
|              | Chloroperlidae    | <i>Isoptera serricornis</i>         | 5676  | 0   | 0   | 0   | 7   |
|              | Leuctridae        | <i>Leuctra hippopus</i>             | 5768  | 1   | 1   | 1   | 1   |
|              | Nemouridae        | <i>Nemoura flexuosa</i>             | 6097  | 0   | 0   | 0   | 1   |
|              | Perlodidae        | <i>Perlodes dispar</i>              | 6373  | 0   | 0   | 0   | 1   |
| Tricho-ptera | [Ord:Trichoptera] | Trichoptera Gen. sp.                | 8670  | 1   | 1   | 0   | 0   |
|              | Beraeidae         | <i>Beraea pullata</i>               | 4441  | 3   | 3   | 0   | 0   |
|              | Glossosomatidae   | <i>Agapetus fuscipes</i>            | 4251  | 4   | 4   | 37  | 0   |
|              |                   | <i>Synagapetus iridipennis</i>      | 6954  | 0   | 0   | 2   | 0   |
|              | Goeridae          | <i>Silo nigricornis</i>             | 6833  | 1   | 1   | 6   | 0   |
|              | Hydropsychidae    | <i>Hydropsyche angustipennis</i>    | 5588  | 2   | 2   | 0   | 0   |
|              |                   | <i>Hydropsyche pellucidula</i>      | 5601  | 1   | 1   | 2   | 0   |
|              |                   | <i>Hydropsyche saxonica</i>         | 5602  | 2   | 2   | 6   | 0   |
|              |                   | <i>Hydropsyche siltalai</i>         | 5604  | 19  | 16  | 151 | 0   |
|              | Hydroptilidae     | <i>Hydroptila</i> sp.               | 5616  | 3   | 3   | 2   | 0   |
|              | Lepidostomatidae  | <i>Lepidostoma basale</i>           | 5713  | 5   | 5   | 0   | 0   |
|              | Leptoceridae      | <i>Athripsodes bilineatus</i> ssp.  | 21232 | 9   | 9   | 0   | 0   |
|              |                   | <i>Athripsodes cinereus</i>         | 4369  | 7   | 6   | 0   | 0   |
|              |                   | <i>Athripsodes</i> sp.              | 4371  | 1   | 0   | 0   | 0   |
|              |                   | <i>Ceraclea annulicornis</i>        | 4579  | 2   | 2   | 0   | 0   |
|              | Limnephilidae     | <i>Anabolia nervosa</i>             | 4300  | 13  | 12  | 9   | 0   |
|              |                   | <i>Chaetopteryx villosa</i>         | 8826  | 14  | 13  | 215 | 18  |
|              |                   | <i>Halesus digitatus</i>            | 21501 | 101 | 100 | 159 | 1   |
|              |                   | <i>Halesus radiatus</i>             | 5376  | 83  | 81  | 182 | 4   |
|              |                   | <i>Halesus</i> sp.                  | 5378  | 0   | 0   | 0   | 3   |
|              |                   | <i>Halesus tessellatus</i>          | 5379  | 9   | 9   | 1   | 0   |
|              |                   | Limnephilidae Gen. sp.              | 5809  | 1   | 1   | 0   | 0   |
|              |                   | <i>Limnephilus decipiens</i>        | 5824  | 1   | 1   | 1   | 0   |
|              |                   | <i>Limnephilus flavicornis</i>      | 5827  | 0   | 0   | 1   | 0   |
|              |                   | <i>Limnephilus lunatus</i>          | 5837  | 17  | 16  | 0   | 0   |
|              |                   | <i>Limnephilus rhombicus</i> ssp.   | 19351 | 1   | 1   | 7   | 0   |
|              |                   | <i>Micropterna sequax</i>           | 6023  | 0   | 0   | 1   | 0   |
|              | Philopotamidae    | <i>Parachiona picicornis</i>        | 6278  | 0   | 0   | 2   | 0   |
|              |                   | <i>Potamophylax cingulatus</i>      | 19394 | 0   | 0   | 34  | 8   |
|              |                   | <i>Potamophylax luctuosus</i>       | 21665 | 0   | 0   | 17  | 5   |
|              |                   | <i>Potamophylax</i> sp.             | 6527  | 0   | 0   | 1   | 0   |
|              |                   | <i>Wormaldia occipitalis</i>        | 19450 | 1   | 1   | 0   | 0   |
|              | Polycentropodidae | <i>Plectrocnemia conspersa</i>      | 21218 | 64  | 64  | 311 | 145 |
|              |                   | <i>Polycentropus irroratus</i>      | 6469  | 4   | 4   | 0   | 3   |
|              | Psychomyiidae     | <i>Lype phaeopa</i>                 | 5920  | 10  | 10  | 16  | 8   |
|              |                   | <i>Lype reducta</i>                 | 5921  | 83  | 82  | 20  | 14  |
|              |                   | <i>Tinodes rostocki</i>             | 7066  | 0   | 0   | 1   | 0   |
|              | Rhyacophilidae    | <i>Rhyacophila fasciata</i>         | 21233 | 0   | 0   | 32  | 31  |
|              | Sericostomatidae  | <i>Notidobia ciliaris</i>           | 6134  | 22  | 22  | 0   | 9   |
|              |                   | <i>Sericostoma personatum</i>       | 6817  | 164 | 150 | 694 | 194 |
| Turbel-laria | Dugesidae         | <i>Dugesia gonocephala</i>          | 5018  | 34  | 25  | 279 | 0   |
